# Supplementary material for: One-step synthesis of porous graphene-based hydrogels containing oil droplets for drug delivery
Source: Royal Society of Chemistry journal article supplement (doi:10.1039/c3ra44993a), 2013-12-03
Supplement: c3ra44993a.pdf [file c3ra44993a.pdf]

## Electronic Supplementary Information

### One-step synthesis of porous graphene-based hydrogels containing oil droplets for drug delivery

Xiaoyu Gu, Yin Ning, Yu Yang and Chaoyang Wang

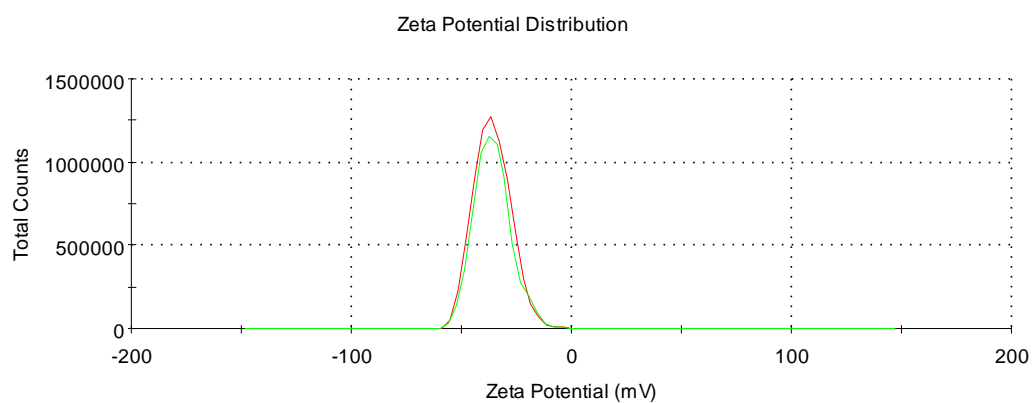

**Figure S1.** Zeta potential of GO in aqueous solution.

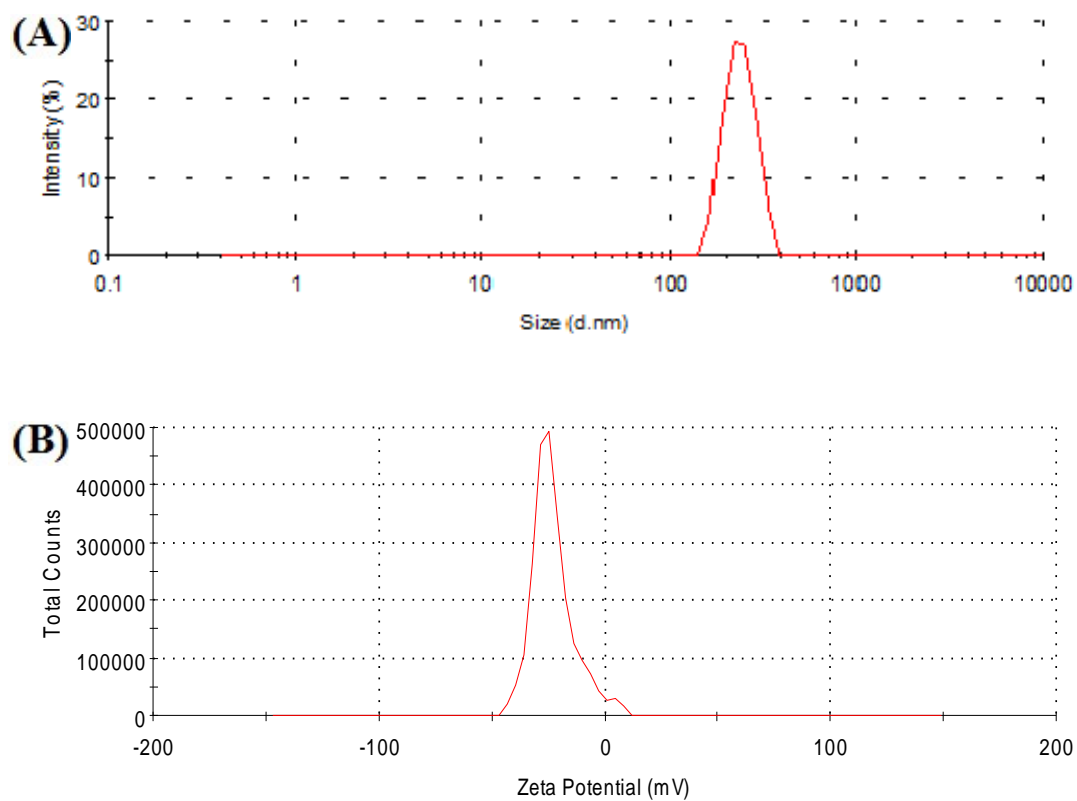

**Figure S2.** (a) Size and (b) Zeta potential of Fe<sub>3</sub>O<sub>4</sub> in water.

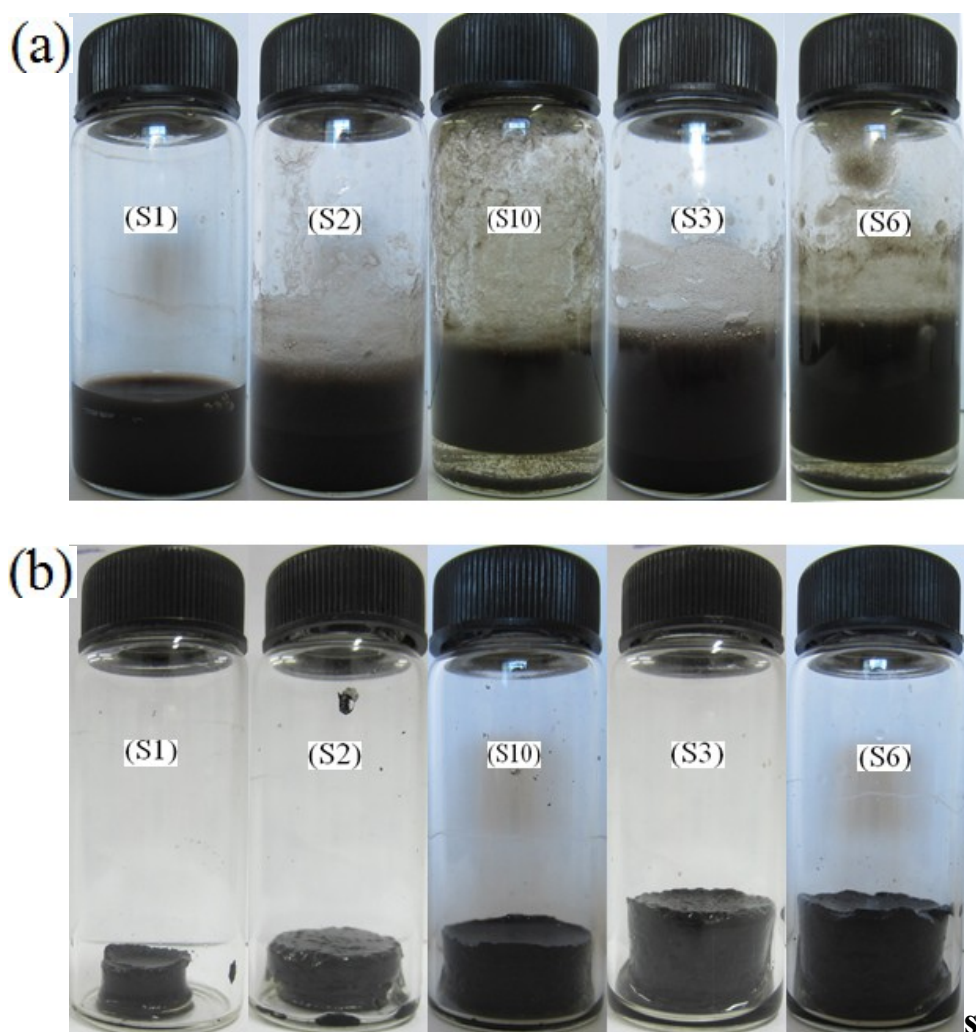

**Figure S3.** (a) Photos of the GO aqueous dispersion (S1) and typical Pickering emulsions (S2, S3, S6, S10) and (b) the corresponding prepared RGO hydrogels.

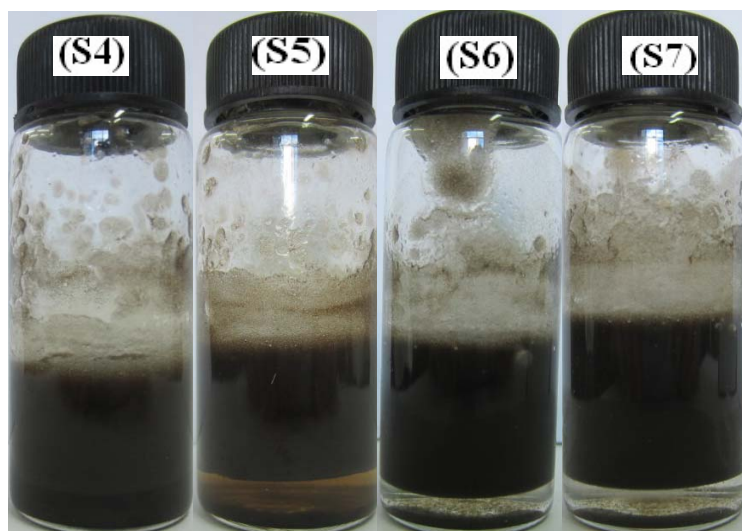

**Figure S4.** Photographs of emulsions S4, S5, S6 and S7.

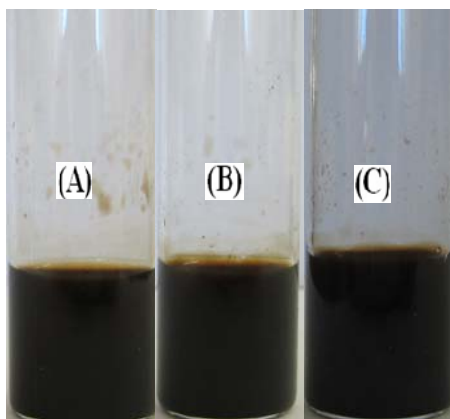

**Figure S5.** Photos of GO aqueous dispersions with different concentrations of  $\text{Fe}_3\text{O}_4$ :  
(a) 0 mg/mL, (b) 1.5 mg/mL, and (c) 2.5 mg/mL.

(A)

| Sample            | GO<br>(5 mg/mL) | Fe <sub>3</sub> O <sub>4</sub><br>(20 mg/mL) | b<br>(GO:Fe <sub>3</sub> O <sub>4</sub> =10:3) | c<br>(GO:Fe <sub>3</sub> O <sub>4</sub> =2:1) |
|-------------------|-----------------|----------------------------------------------|------------------------------------------------|-----------------------------------------------|
| Contact angle (°) | 39.2            | 14.1                                         | 35.2                                           | 35.1                                          |

Note: The ratio of GO and Fe<sub>3</sub>O<sub>4</sub> is the weight ratio.

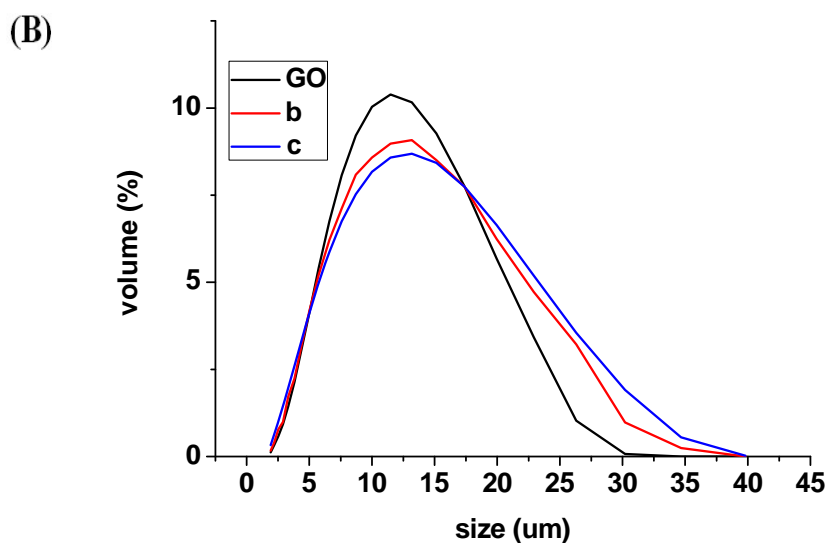

**Figure S6.** (A) Contact angle of GO, Fe<sub>3</sub>O<sub>4</sub>, GO and Fe<sub>3</sub>O<sub>4</sub> mixture dispersions (b: GO:Fe<sub>3</sub>O<sub>4</sub>=10:3 w:w; c: GO:Fe<sub>3</sub>O<sub>4</sub>=2:1, w:w); (B) the size and size distribution of the dispersions.

To study the interaction between GO and Fe<sub>3</sub>O<sub>4</sub>, we put both in three vials without oil phase (Figure S4). From left to right, the concentrations of Fe<sub>3</sub>O<sub>4</sub> were 0, 1.5, 2.5 mg/mL, and the size of mixed solute was 11.1, 12.4, 12.9 μm, respectively (Figure S6B), small increase on size after adding Fe<sub>3</sub>O<sub>4</sub> nanoparticles as we can see. It also can attribute to the combination of GO and Fe<sub>3</sub>O<sub>4</sub>. We observed three vials after one week without stirring, aqueous solution was still homogeneous, no sedimentation occurred even after one week. If GO sheets and Fe<sub>3</sub>O<sub>4</sub> nanoparticles formed complexes, which more easily assembled at the interface of water-oil phase, GO

would totally enter into emulsion so that the bottom became clear. Then these three aqueous solutions were used to cast into membranes under room temperature. The contact angles (CA) of them were 39.2, 35.2, 35.1°, respectively (Figure S6A). Bare Fe<sub>3</sub>O<sub>4</sub> aqueous membrane had much smaller CA (14.1°), indicating Fe<sub>3</sub>O<sub>4</sub> nanoparticles was more hydrophilic than GO sheets. The CA of RGO (49.5°) was much bigger than GO, it assigned to the decrease of oxygen-containing groups when heating. After adding Fe<sub>3</sub>O<sub>4</sub>, aqueous solution became viscosity and membrane was a little more hydrophilic than bare GO membrane. The mixture of them had a Zeta potential (-38.1 mV) falling in between them, their CA was in accordance with their Zeta potential. Therefore it is reasonable that complexes stably existing in emulsion.

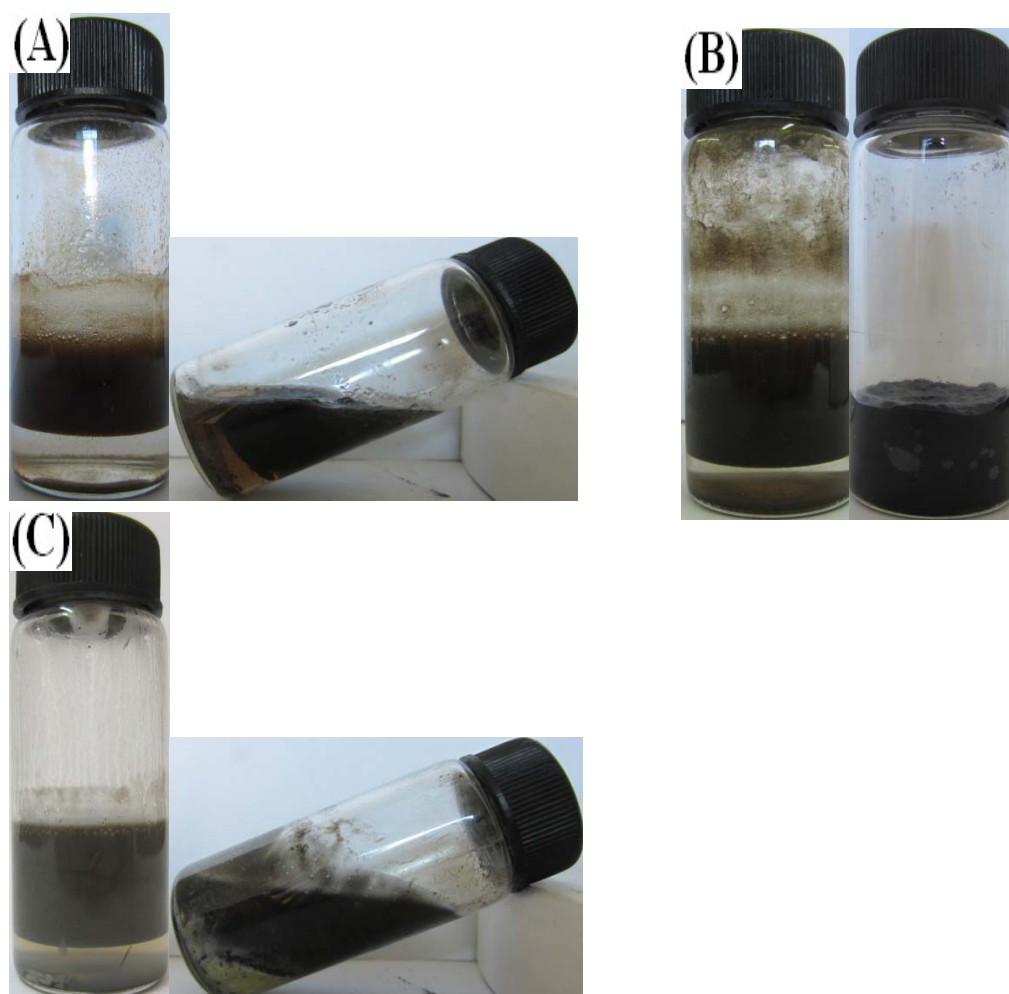

**Figure S7.** (A) Photos of S8 emulsion and the mixture after heating for 2 h, (B) Photos of S9 emulsion and the prepared hydrogel after heating for 2 h, (C) Photos of the emulsion using Tween 60 as stabilizer and the mixture after heating for 2 h.



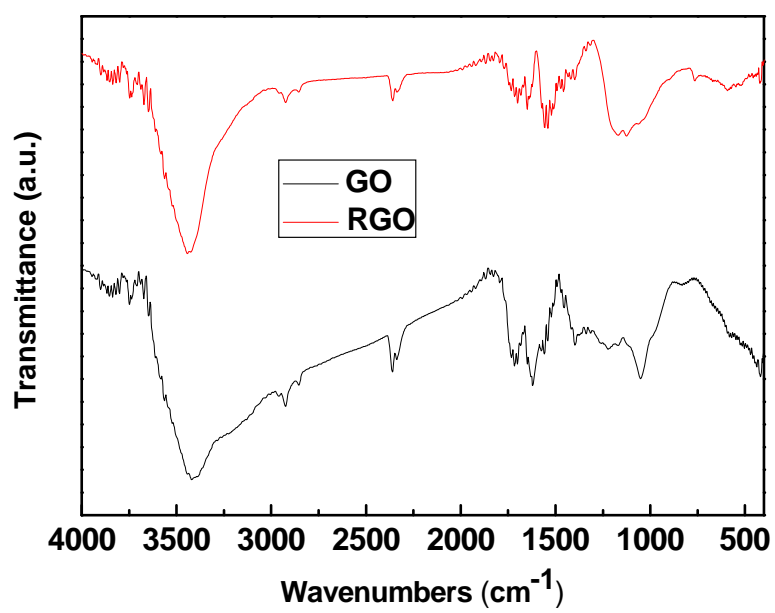

**Figure S8.** FTIR spectra of GO and RGO

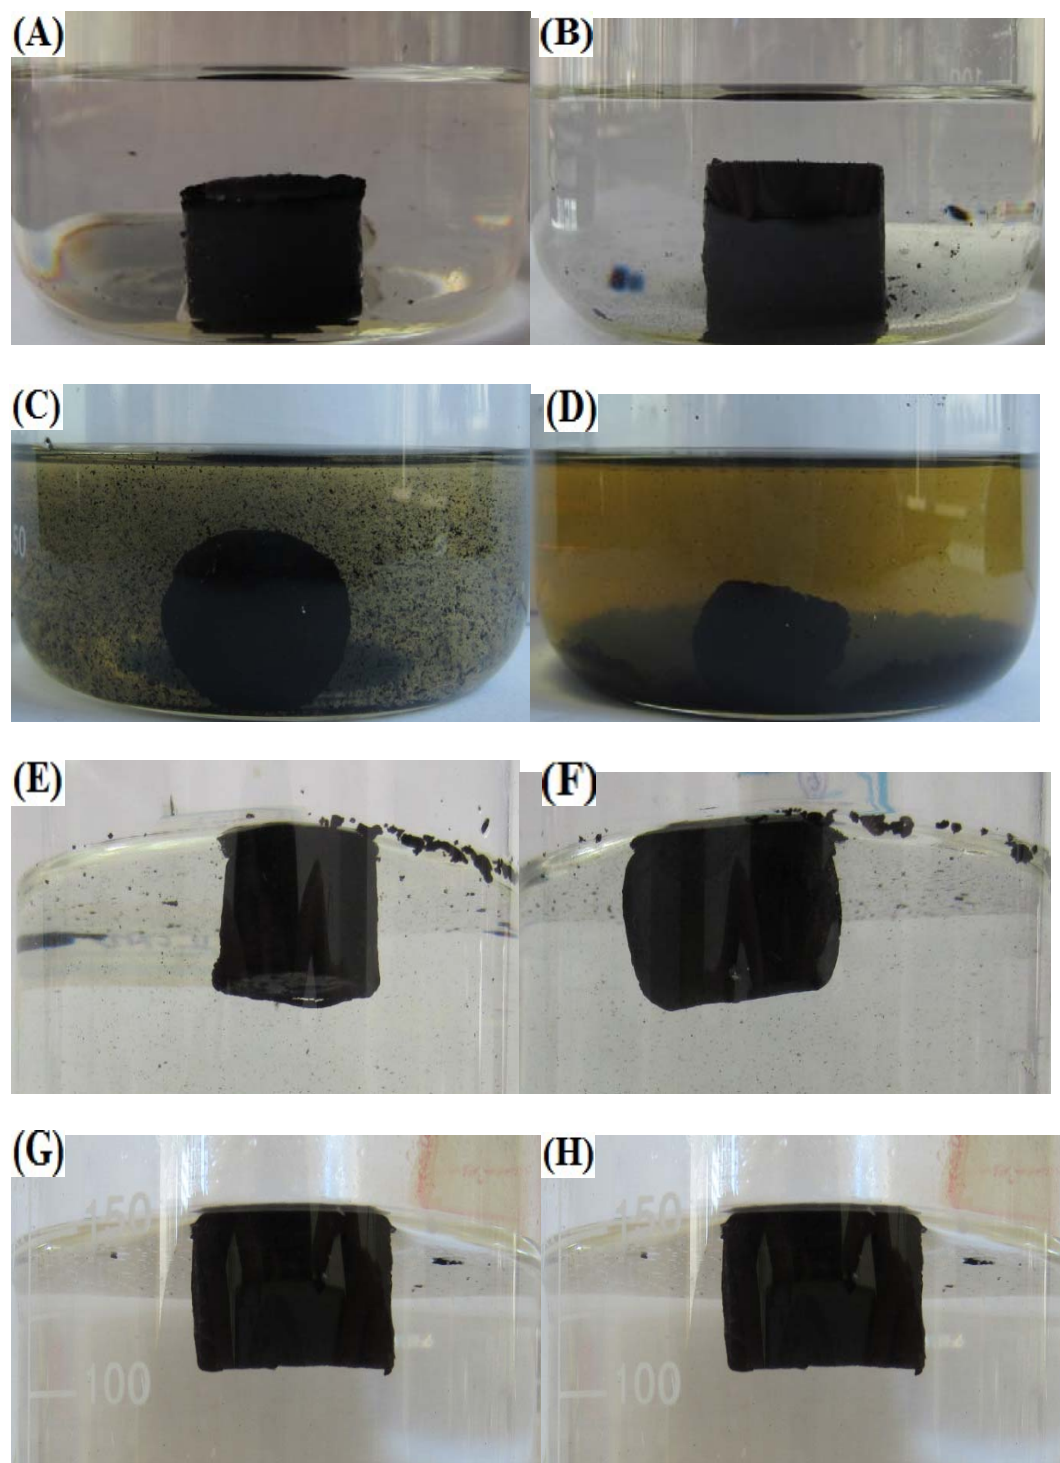

**Figure S9.** Photos of hydrogels after release in external phases: (A) PN-loaded S10 hydrogel in hexane, (B) PN-loaded S6 hydrogel in hexane, (C) PN-loaded S10 hydrogel in acetone, (D) PN-loaded S6 hydrogel in acetone; (E) IBU-loaded S10 hydrogel in PBS (pH=7.4), (F) IBU-loaded S6 hydrogel in PBS (pH=7.4), (G) IBU-loaded S10 hydrogel in PBS (pH=2.0), (H) IBU-loaded S6 hydrogel in PBS (pH=2.0).
